# Supplementary material
Source: publisher site journal article supplement (https://www.dovepress.com/article/275387)
Supplement: Supplementary file 1 [file get_supplementary_file.php]

Appendix A. The Life Satisfaction Index A with the twenty items.

1. As I grow older, things seem better than I thought they would be
2. I have gotten more of the breaks in life than most of the people I know
3. This is the dreariest time of my life.
4. I am just as happy as when I was younger
5. My life could be happier than it is now
6. These are the best years of my life
7. Most of the things I do are boring or monotonous
8. I expect some interesting and pleasant things to happen to me in the future
9. The things I do are as interesting to me as they ever were
10. I feel old and sometimes tired
11. I feel my age, but it does bother me
12. As I look on my life, I am fairly well satisfied
13. I would not change my past life even if I could
14. Compared to other people my age, I’ve made a lot of foolish decisions in my life
15. Compared to other people my age, I make a good appearance
16. I have made plans for things I’ll be doing a month or a year from now
17. When I think back over my life, I didn’t get most of the important things I wanted
18. Compared to other people, I get down in the dumps too often
19. I have got pretty much what I expected out of life
20. In spite of what people say, the lot of the average man is getting worse

Reproduced from Neugarten BL, Havighurst RJ, Tobin SS. The Measurement of Life Satisfaction. *Journal of Gerontology*, 1961;16(2):134–143, by permission of Oxford University Press.

Appendix B. Deciles for LSI-A scores stratified for sex and age decade (n=5815). Swedish norm values.

|  | 60 years old | | 70 years old | | 80 years old | | 90 years old | |
| --- | --- | --- | --- | --- | --- | --- | --- | --- |
|  | Men | Women | Men | Women | Men | Women | Men | Women |
| Percentile | n=1641 | n=1748 | n=337 | n=423 | n=602 | n=831 | n=76 | n=157 |
| 10th | 20.0 | 19.0 | 20.0 | 16.0 | 17.8 | 15.0 | 15.7 | 13.0 |
| 20th | 24.0 | 23.0 | 23.0 | 20.0 | 21.0 | 19.0 | 18.4 | 18.0 |
| 30th | 27.0 | 26.0 | 26.0 | 23.0 | 24.0 | 22.0 | 20.1 | 20.0 |
| 40th | 29.0 | 28.0 | 27.0 | 25.3 | 26.0 | 24.0 | 21.8 | 22.0 |
| 50th | 31.0 | 30.0 | 29.0 | 27.0 | 28.0 | 26.0 | 24.0 | 23.0 |
| 60th | 32.0 | 32.0 | 30.0 | 29.4 | 30.0 | 27.0 | 27.0 | 26.0 |
| 70th | 34.0 | 33.0 | 32.0 | 31.0 | 31.0 | 29.0 | 28.0 | 28.0 |
| 80th | 35.0 | 35.0 | 33.0 | 32.2 | 33.0 | 32.0 | 29.8 | 30.4 |
| 90th | 36.0 | 36.0 | 35.0 | 35.0 | 35.0 | 34.0 | 32.3 | 34.0 |
